# Supplementary material for: Adsorption Characteristics of Dodecamethylcyclohexasiloxane and Dodecamethylpentasiloxane from Landfill Leachate by Municipal Solid Waste under the Landfill Circumstance
Source: MDPI journal article supplement (doi:10.3390/w15010102), 2022-12-28
Supplement: s1 [file s1]

*Supplementary materials*

# **Adsorption Characteristics of Dodecamethylcyclhexasiloxane and Dodecamethylpentasiloxane from Landfill Leachate by Municipal Solid Waste under the Landfill Circumstance**

**Qingna Kong <sup>1</sup>, Peili Zhang <sup>1</sup>, Hao Wang <sup>1</sup>, Xing Lin <sup>1</sup>, Jiadong Xu <sup>1</sup>, Ben Zhang <sup>2</sup>,  
Zhicheng Zhang <sup>1</sup>, Hui Chen <sup>1,\*</sup> and Jun Yao <sup>1,\*</sup>**

<sup>1</sup> Engineering Technology Center for Pollution Prevention and Control of  
Taizhou, Taizhou University, Taizhou 318000, China

<sup>2</sup> Taizhou Lvshuiqingshan Environmental Technology Co., Ltd.,  
Taizhou 318000, China

\* Correspondence: chenhui87@tzc.edu.cn (H.C.); junyao@tzc.edu.cn (J.Y.);  
Tel.: +86-576-88660364 (J.Y.)

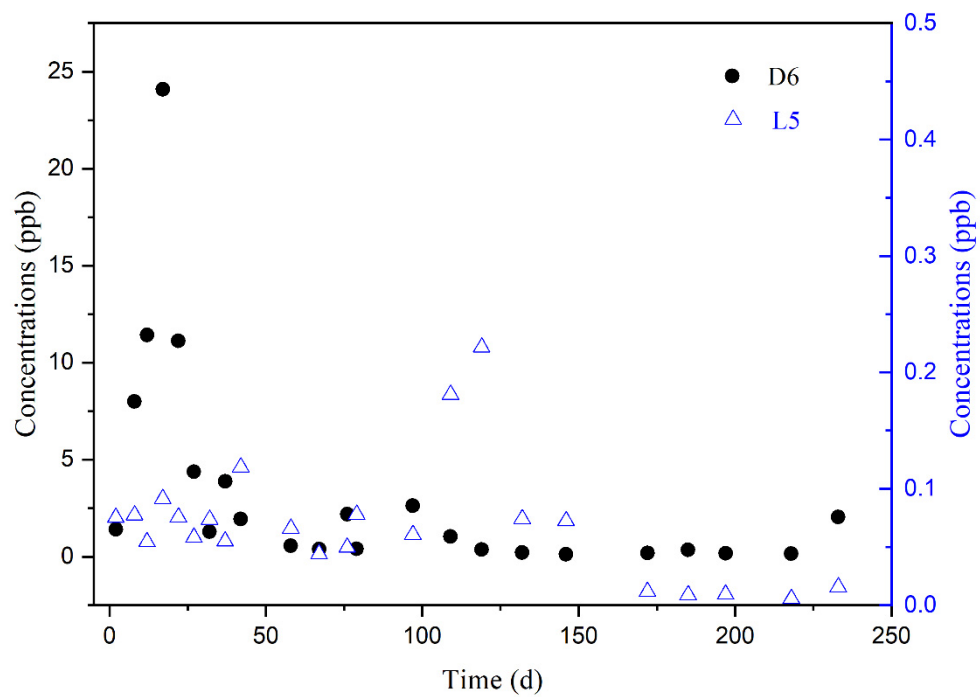

**Figure S1.** Evolution of concentration of L5 and D6 in simulate landfill reactor.

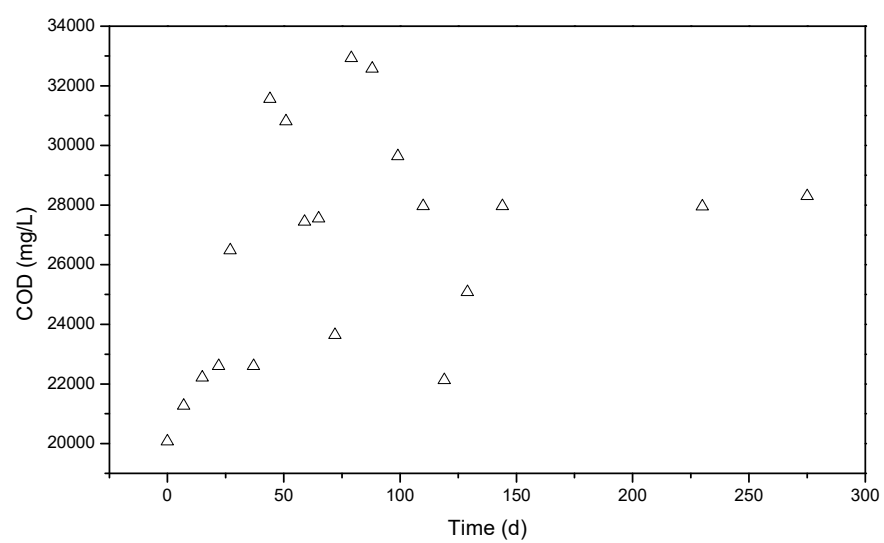

**Figure S2.** Variation of COD in landfill leachate.

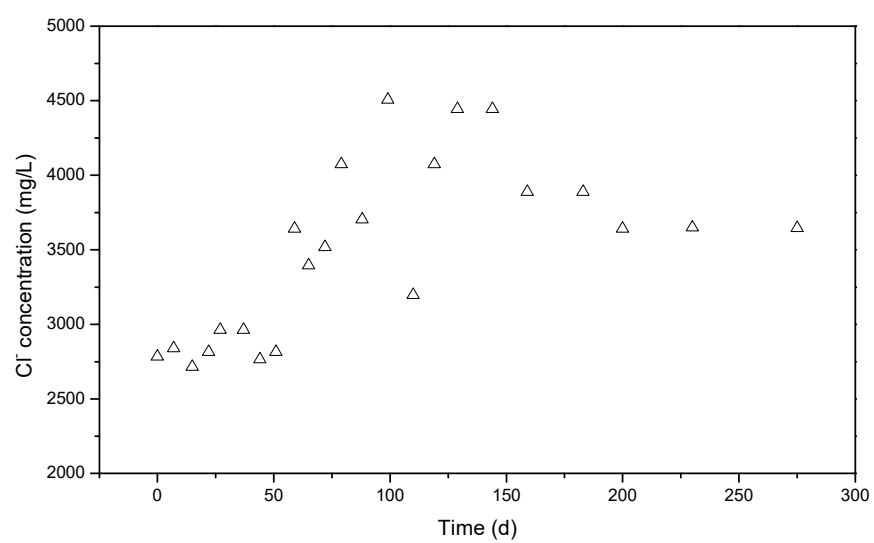

**Figure S3.** Variation of  $\text{Cl}^-$  in landfill leachate.

**Table S1.** Molecular structure of the siloxane compound

| Siloxane compound | Molecular structure |
|-------------------|---------------------|
| L2                |                     |
| L3                |                     |
| L4                |                     |
| L5                |                     |
| D3                |                     |
| D4                |                     |
| D5                |                     |
| D6                |                     |

**Table S2.** Main composition of MSW (mg kg<sup>-1</sup> dry MSW)

| Ba   | Mn  | Al    | Fe    | Zn   | Mg   | Ca    | As  | Pb | Cr  | Cu  | Organic<br>matter % | Moisture<br>content % |
|------|-----|-------|-------|------|------|-------|-----|----|-----|-----|---------------------|-----------------------|
| 5851 | 834 | 49228 | 27764 | 3965 | 7429 | 39514 | 124 | 81 | 116 | 193 | 15.7                | 12.7                  |

**Table S3.** detailed condition for the GC-MS analysis

| <b>GC-MS conditions</b> |                                |
|-------------------------|--------------------------------|
| Colume                  | DB-5MS UI                      |
| Injector temp           | 200 °C                         |
| Temperature program     | 40 °C for 3 minutes            |
|                         | 20°C/min to 180°C for 0 minute |
|                         | 40°C/min to 280°C for 1 minute |
| Interface temperature   | 260°C                          |
| Quadrupole temperature  | 150°C                          |
| Ion source temperature  | 230°C                          |
| Scan mode               | SIM                            |
| Carrier gas             | 99.999%He                      |

**Table S4.** Molecular weight and boiling point of L5 and D6

|    | molecular weight | boiling point (°C) |
|----|------------------|--------------------|
| L5 | 385              | 232                |
| D6 | 444              | 245.1              |
